# Supplementary material
Source: PubMed Central journal article supplement (PMC5729581)
Supplement: NIHMS926007-supplement-Supplemental_Figures_and_Tables.pdf [file NIHMS926007-supplement-Supplemental_Figures_and_Tables.pdf]

## Supporting Information

### **Hydrogel Encapsulation Facilitates Rapid-Cooling Cryopreservation of Stem Cell-Laden Core-Shell Microcapsules as Cell-Biomaterial Constructs**

*Gang Zhao\**, *Xiaoli Liu*, *Kaixuan Zhu*, and *Xiaoming He\**

Prof. G. Zhao, X. Liu, K. Zhu

Department of Electronic Science and Technology, University of Science and Technology of China, Hefei, Anhui 230027, China

E-mail: zhaog@ustc.edu.cn

Prof. X. He

Department of Biomedical Engineering, The Ohio State University, Columbus, Ohio 43210, USA

E-mail: he.429@osu.edu

#### **Movie Captions**

**Movie S1.** Cell encapsulation with a self-made tube-in-tube capillary microfluidic device

**Movie S2.** Collection of the cell-laden core-shell structured microcapsules

**Movie S3.** Rapid cooling of the microencapsulated cells in conventional plastic straws

**Movie S4.** Rewarming of the cryopreserved microencapsulated cells in conventional plastic straws

Supplementary Figures

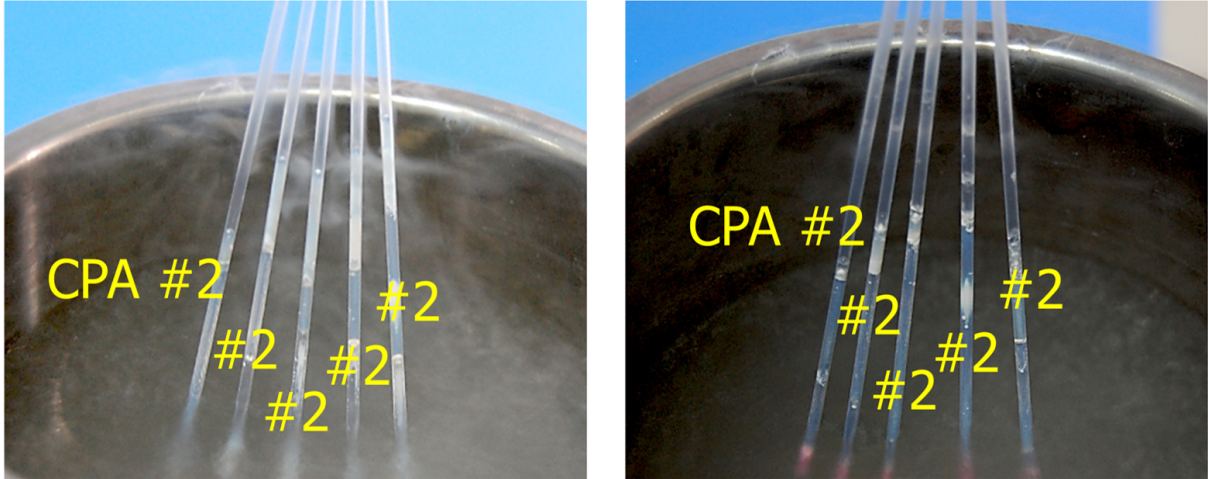

Figure S1. Typical pictures showing partial vitrification of CPA #2 in ten plastic straws

## Supplementary Tables

**Table S1.** Size dependence of the microcapsules on the flow rates

| <b>Flow Rate (<math>\mu\text{L min}^{-1}</math>)</b> | <b>Diameter (<math>\mu\text{m}</math>)</b> | <b>Shell thickness (<math>\mu\text{m}</math>)</b> |
|------------------------------------------------------|--------------------------------------------|---------------------------------------------------|
| <b>(core-shell-oil)</b>                              | <b>Mean <math>\pm</math> SD (n)</b>        | <b>Mean <math>\pm</math> SD (n)</b>               |
| <b>10-20-600<sup>&amp;</sup></b>                     | 525.3 $\pm$ 51.4 (84)                      | -                                                 |
| <b>10-20-300<sup>&amp;</sup></b>                     | 682.4 $\pm$ 63.9 (78)                      | -                                                 |
| <b>10-20-150<sup>&amp;</sup></b>                     | 832.8 $\pm$ 64.4 (70)                      | -                                                 |
| <b>10-10-600</b>                                     | 480.3 $\pm$ 6.0 (89)                       | 35.3 $\pm$ 4.8 (79)                               |
| <b>10-20-600</b>                                     | 525.9 $\pm$ 8.6 (63)                       | 53.5 $\pm$ 6.6 (60)                               |
| <b>10-30-600</b>                                     | 545.1 $\pm$ 10.1 (64)                      | 75.0 $\pm$ 8.9 (81)                               |

<sup>&</sup> the shell thicknesses of these microcapsules were not measured.

**Table S2.** Viability of pADSCs post CPA treatment or cryopreservation

| <b>Group</b>           | <b>Viability (%) (Mean <math>\pm</math> SD, n)</b> |                     |
|------------------------|----------------------------------------------------|---------------------|
|                        | <b>W/O Encap</b>                                   | <b>W/ Encap</b>     |
| <b>Fresh (Control)</b> | 96.5 $\pm$ 1.3 (5)                                 | -                   |
| <b>CPA Treatment</b>   | 92.7 $\pm$ 1.2 (5)                                 | 94.0 $\pm$ 1.1 (4)  |
| <b>CPA #1</b>          | 23.7 $\pm$ 4.6 (5)                                 | 73.1 $\pm$ 5.1 (4)  |
| <b>CPA #2</b>          | 25.2 $\pm$ 3.6 (5)                                 | 70.9 $\pm$ 5.0 (10) |
| <b>CPA #3</b>          | 25.0 $\pm$ 4.6 (5)                                 | 62.8 $\pm$ 6.5 (4)  |
| <b>CPA #4</b>          | 21.4 $\pm$ 3.6 (4)                                 | 55.8 $\pm$ 4.6 (7)  |

**Table S3.** Genes, primers, and the NCBI registry numbers of the genes used for qRT-PCR study of pADSCs

| Gene   |         | Primer                       | NCBI registry number |
|--------|---------|------------------------------|----------------------|
| pOCT4  | Forward | TCGCCAGAAGGGCAAAC            | NM_001113060.1       |
|        | Reverse | CAGGGTGGTGAAGTGAGGG          |                      |
| pSOX2  | Forward | CCGTGGTTACCTCTTCTTCCC        | NM_001123197.1       |
|        | Reverse | TACCGTTGATGGCCGTGCC          |                      |
| pKLF4  | Forward | ACACCTGCGAACCCACACA          | NM_001031782.2       |
|        | Reverse | GCGGTAGTGCCTGGTCAGTT         |                      |
| pNANOG | Forward | AGCCCCAGCTCCAGTTTCAGC        | NM_001129971.1       |
|        | Reverse | AATGATCGTCACATATCTTCAGGCTGTA |                      |
| pGapdh | Forward | GCAATGCCTCCTGTACCACC         | AF017079.1           |
|        | Reverse | TCACGCCACAGTTTCCCAG          |                      |
